# Supplementary material for: Crystal packing and physical properties of pyridinium tetrabromocuprate(II) complexes assembled via hydrogen bonds and aromatic stacking interactions
Source: Royal Society of Chemistry journal article supplement (doi:10.1039/b104085p), 2001-01-01

**Electronic Supporting Information** concerning the manuscript **BP104085P** entitled:

**Crystal packing and physical properties of pyridinium tetrabromocuprate(II) complexes assembled *via* hydrogen bonds and aromatic stacking interactions**

by Antonio Luque,\* Jon Sertucha, Oscar Castillo and Pascual Román

The present Supporting Information contains the following items:

- S1: Experimental and calculated X-ray powder diffraction patterns for compound 1
- S2: Thermalanalytical curves (TG/DTA) for compound 1–4

# Experimental and calculated X-ray powder diffraction patterns for compound 1

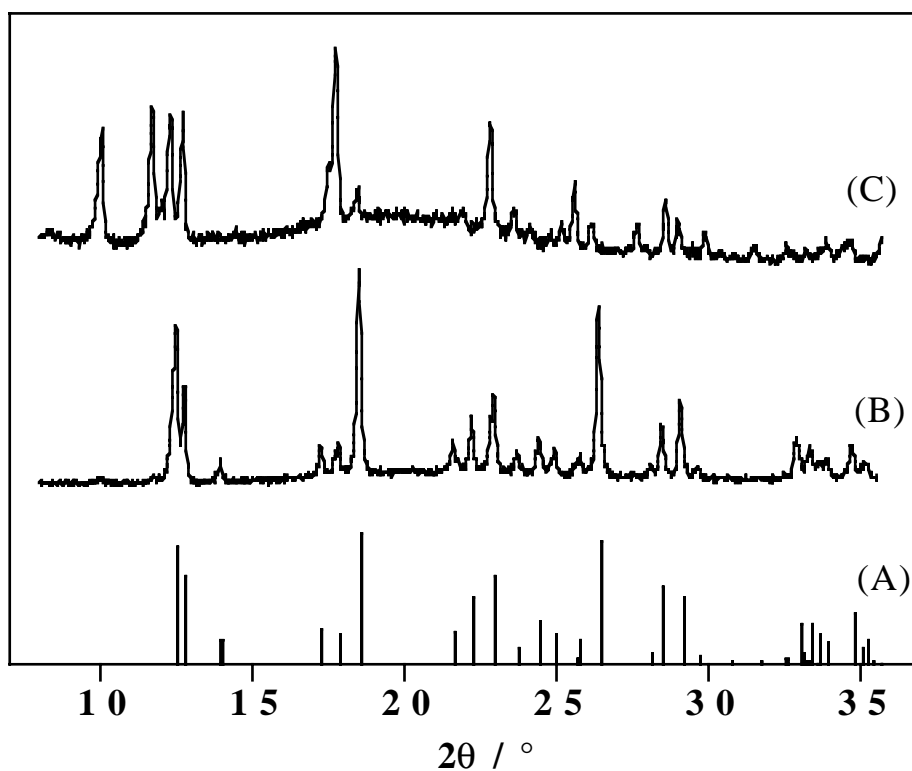

| 300 K |    |    |                        |                        |                    | 355 K |   |    |                        |                        |                    |
|-------|----|----|------------------------|------------------------|--------------------|-------|---|----|------------------------|------------------------|--------------------|
| h     | k  | l  | (A)                    | (B)                    |                    | h     | k | l  | (C)                    | $2\theta_{\text{exp}}$ | $I/I_{\text{max}}$ |
|       |    |    | $2\theta_{\text{cal}}$ | $2\theta_{\text{exp}}$ | $I/I_{\text{max}}$ |       |   |    | $2\theta_{\text{cal}}$ |                        |                    |
| 1     | 1  | 0  | 12.520                 | 12.493                 | 91                 | 0     | 0 | 1  | 10.078                 | 10.052                 | 81                 |
| 0     | 0  | -2 | 12.806                 | 12.789                 | 68                 | 1     | 0 | -1 | 11.788                 | 11.757                 | 84                 |
| 0     | -2 | 1  | 13.974                 | 13.964                 | 18                 | 0     | 1 | 1  | 11.927                 | 11.939                 | 17                 |
| -1    | 1  | 2  | 17.281                 | 17.278                 | 28                 | 1     | 0 | 1  | 12.296                 | 12.311                 | 78                 |
| 0     | -2 | 2  | 17.871                 | 17.881                 | 24                 | 0     | 2 | 0  | 12.742                 | 12.721                 | 69                 |
| 1     | -1 | 2  | 18.588                 | 18.573                 | 100                | 2     | 1 | -1 | 17.460                 | 17.472                 | 23                 |
| 1     | -3 | 0  | 21.648                 | 21.633                 | 25                 | 1     | 2 | 1  | 17.743                 | 17.737                 | 100                |
| 1     | 1  | -3 | 22.252                 | 22.261                 | 51                 | 2     | 2 | 0  | 18.370                 | 18.409                 | 17                 |
| 0     | 2  | 3  | 22.977                 | 22.990                 | 68                 | 3     | 0 | -1 | 21.861                 | 21.864                 | 10                 |
| 1     | 1  | 3  | 23.796                 | 23.793                 | 13                 | 3     | 1 | -1 | 22.789                 | 22.797                 | 58                 |
| -2    | 0  | 2  | 24.438                 | 24.429                 | 34                 | 1     | 3 | 1  | 22.831                 |                        |                    |
| 0     | -4 | 0  | 24.975                 | 24.962                 | 22                 | 3     | 1 | 1  | 23.597                 | 23.571                 | 13                 |
| 0     | 4  | 1  | 25.806                 | 25.795                 | 19                 | 1     | 2 | 2  | 25.147                 | 25.150                 | 10                 |
| 2     | 2  | 1  | 26.472                 | 26.470                 | 94                 | 2     | 3 | -1 | 25.220                 |                        |                    |
| 1     | 3  | -3 | 28.505                 | 28.485                 | 61                 | 2     | 1 | 2  | 25.566                 | 25.558                 | 38                 |
| 2     | 2  | 2  | 29.193                 | 29.171                 | 51                 | 0     | 4 | 0  | 25.645                 |                        |                    |
| 2     | -2 | 3  | 33.030                 | 32.990                 | 31                 | 3     | 2 | 1  | 26.115                 | 26.112                 | 13                 |
| 2     | -4 | 0  | 33.410                 | 33.394                 | 31                 | 0     | 4 | 1  | 27.617                 | 27.622                 | 17                 |
| -2    | 4  | 1  | 33.691                 | 33.711                 | 24                 | 1     | 3 | -2 | 28.582                 | 28.571                 | 30                 |
| 0     | 2  | -5 | 34.798                 | 34.784                 | 39                 | 1     | 4 | 1  | 28.531                 |                        |                    |
|       |    |    |                        |                        |                    | 3     | 1 | -2 | 28.548                 |                        |                    |
|       |    |    |                        |                        |                    | 1     | 3 | 2  | 29.022                 | 28.996                 | 18                 |
|       |    |    |                        |                        |                    | 2     | 4 | 0  | 28.936                 |                        |                    |
|       |    |    |                        |                        |                    | 4     | 0 | 1  | 28.892                 |                        |                    |
|       |    |    |                        |                        |                    | 3     | 1 | 2  | 29.852                 | 29.844                 | 12                 |
|       |    |    |                        |                        |                    | 3     | 3 | 1  | 29.873                 |                        |                    |
|       |    |    |                        |                        |                    | 2     | 3 | 2  | 31.479                 | 31.486                 | 10                 |
|       |    |    |                        |                        |                    | 3     | 4 | 0  | 32.623                 | 32.592                 | 11                 |
|       |    |    |                        |                        |                    | 0     | 5 | 1  | 33.834                 | 33.837                 | 10                 |

### Thermoanalytical curves for compound 1

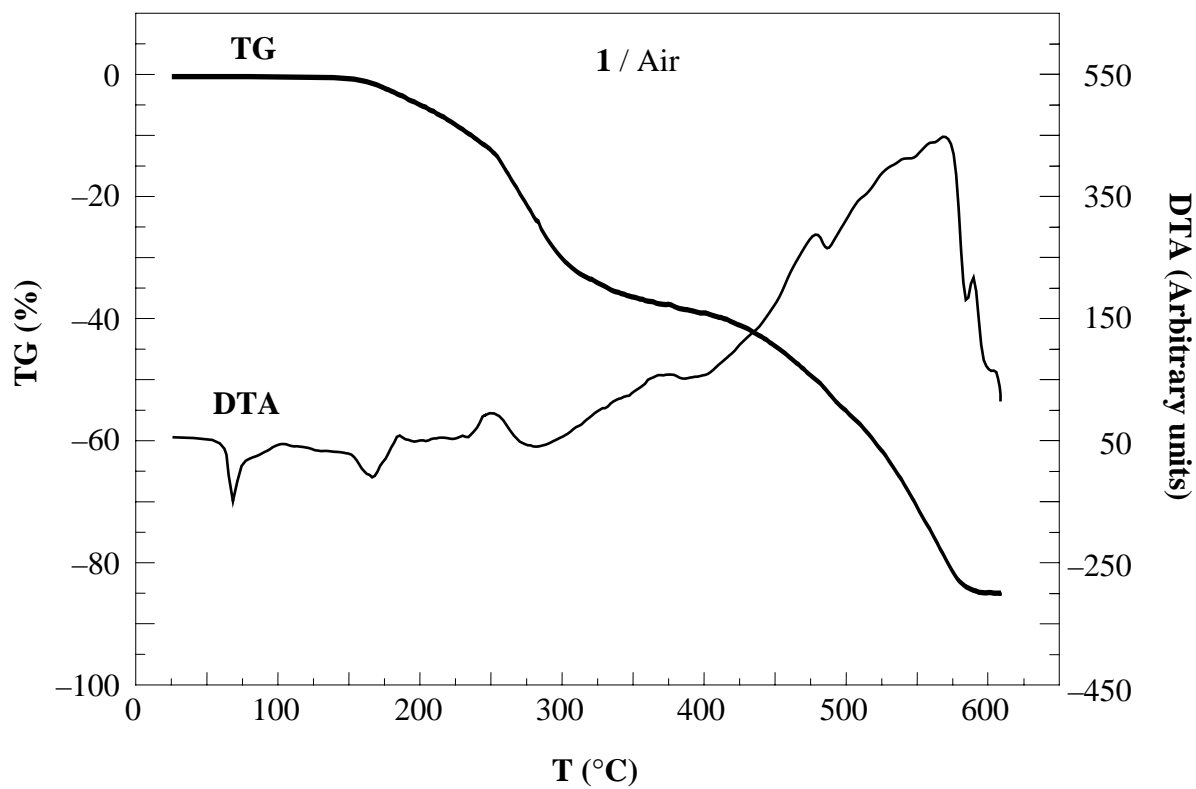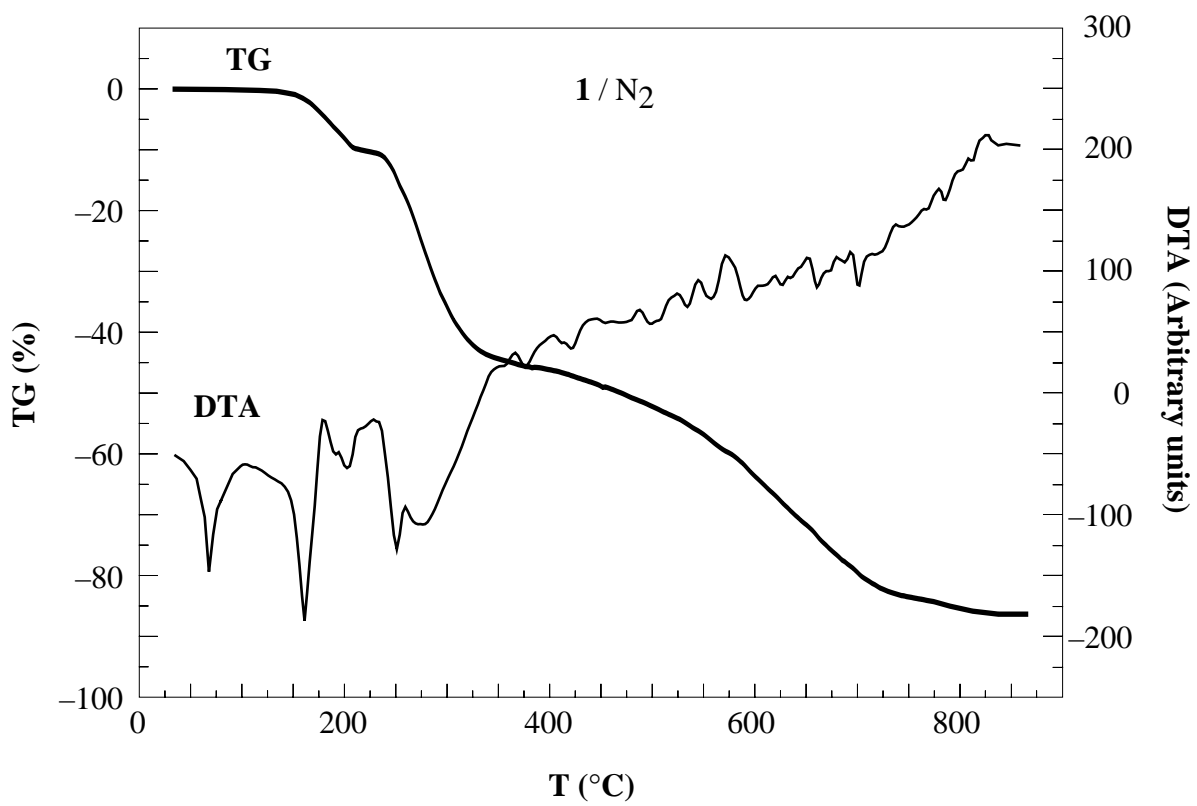

### Thermoanalytical curves for compound 2

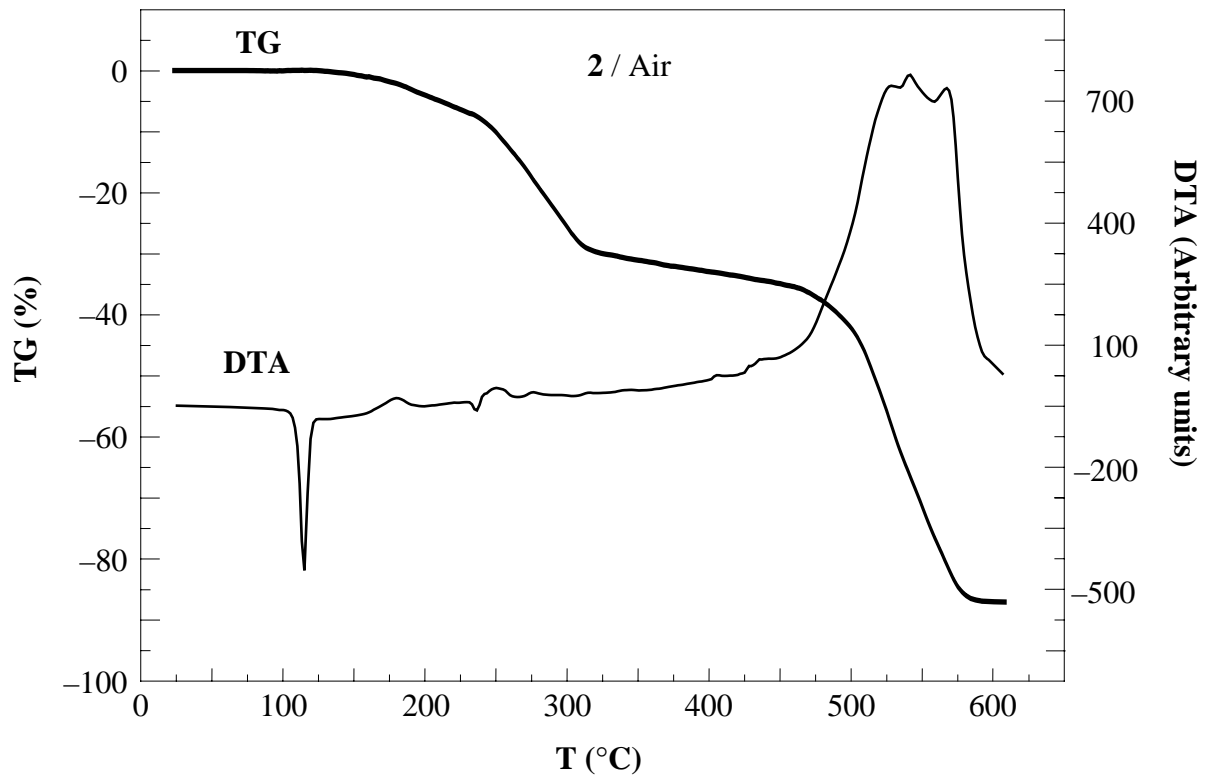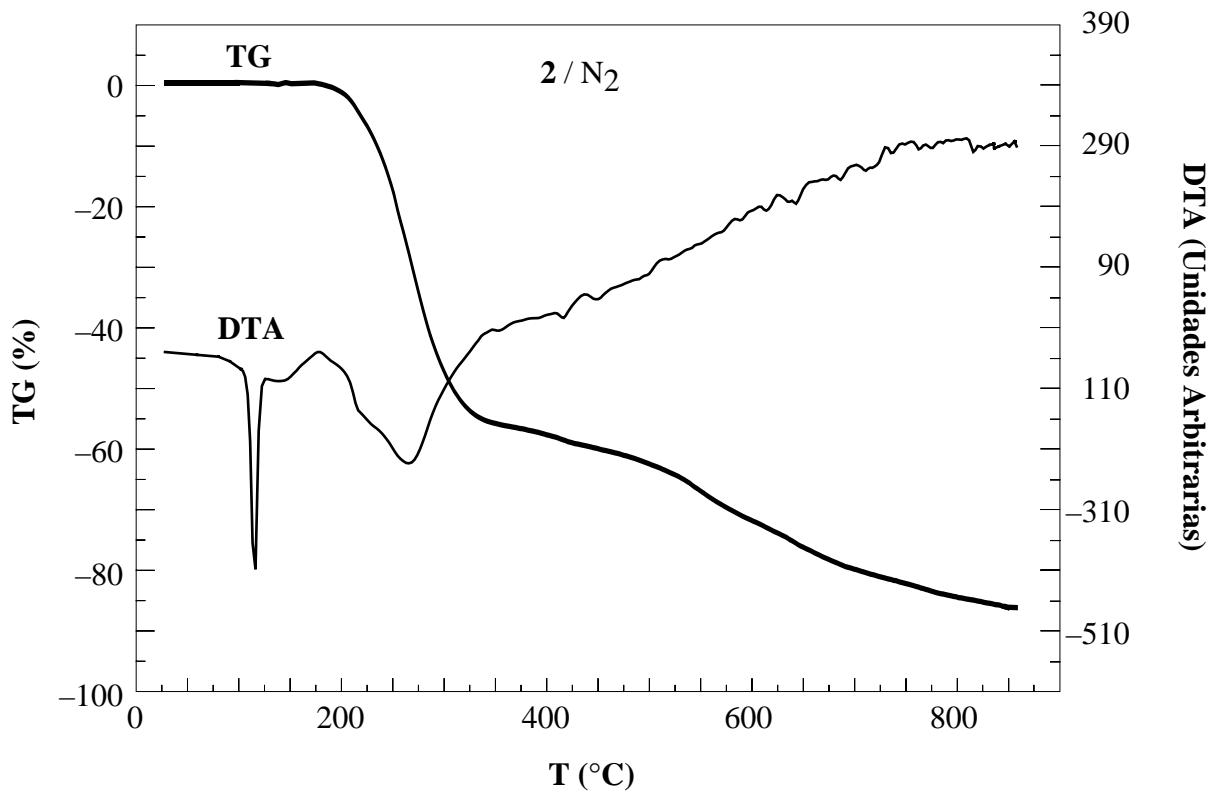

### Thermoanalytical curves for compound 3

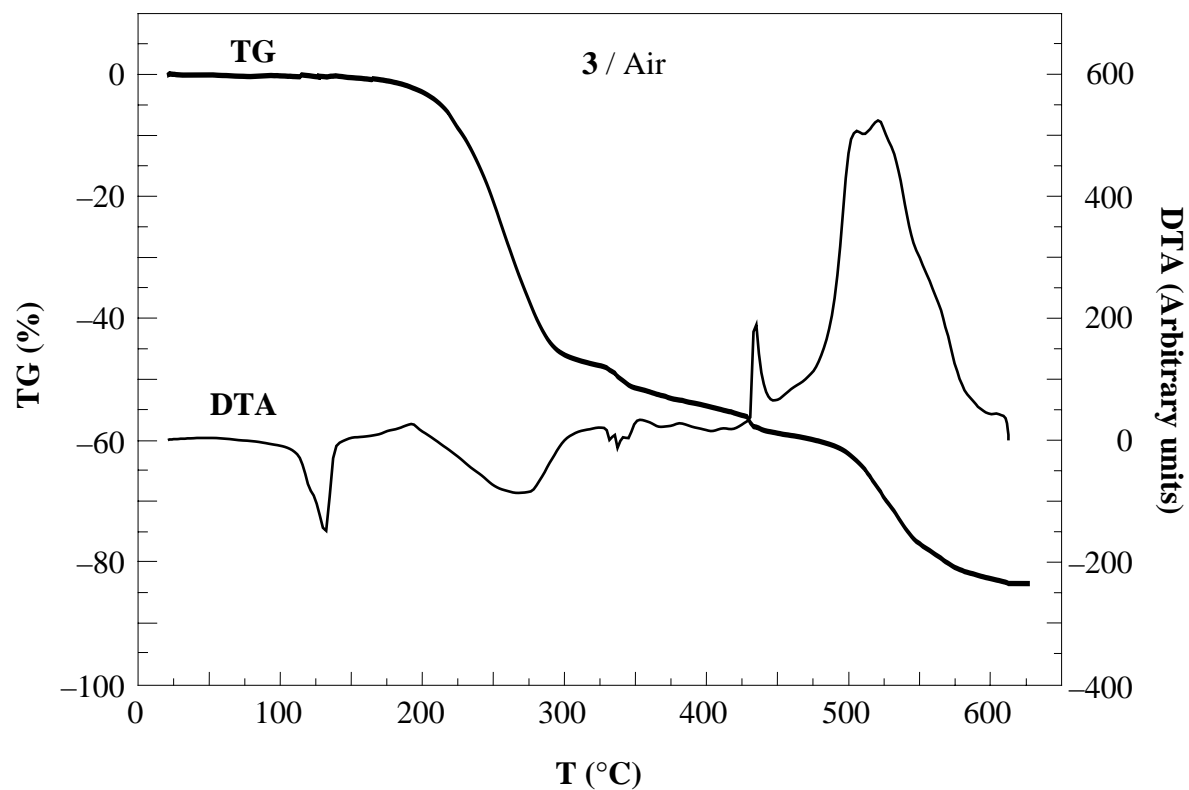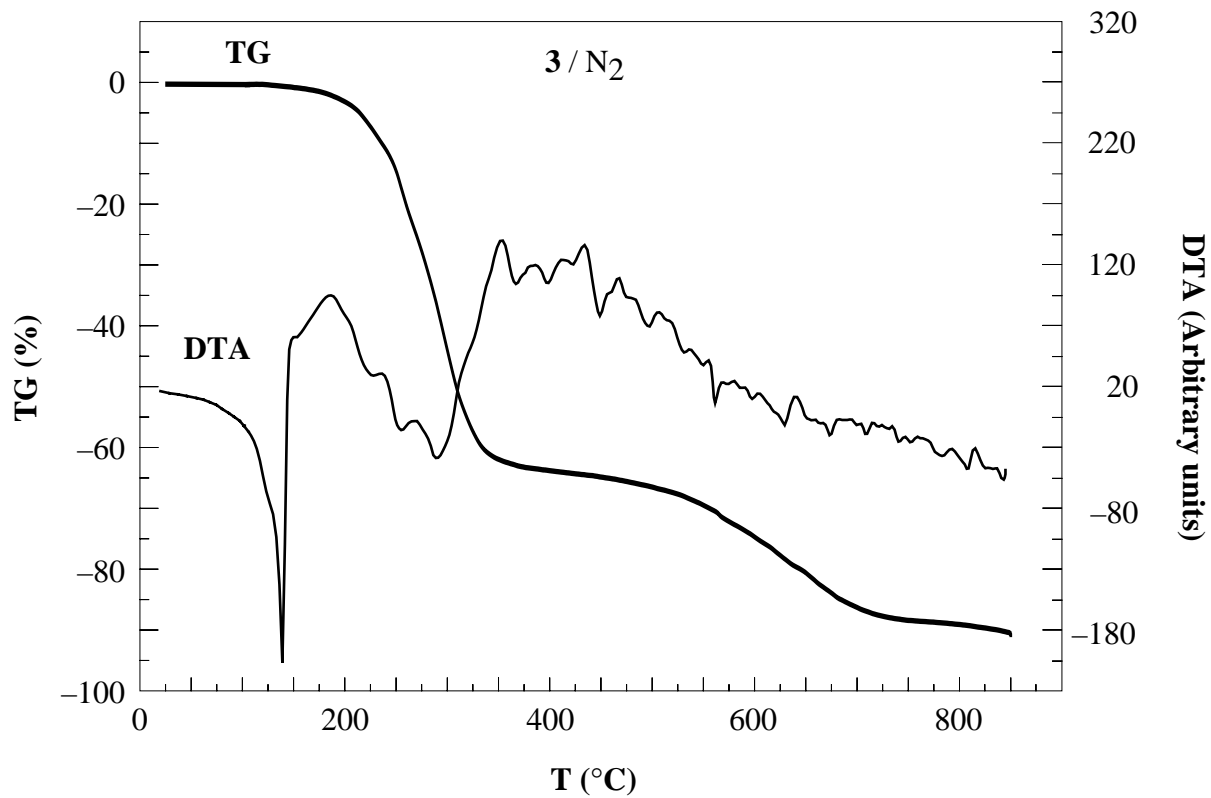

### Thermoanalytical curves for compound 4

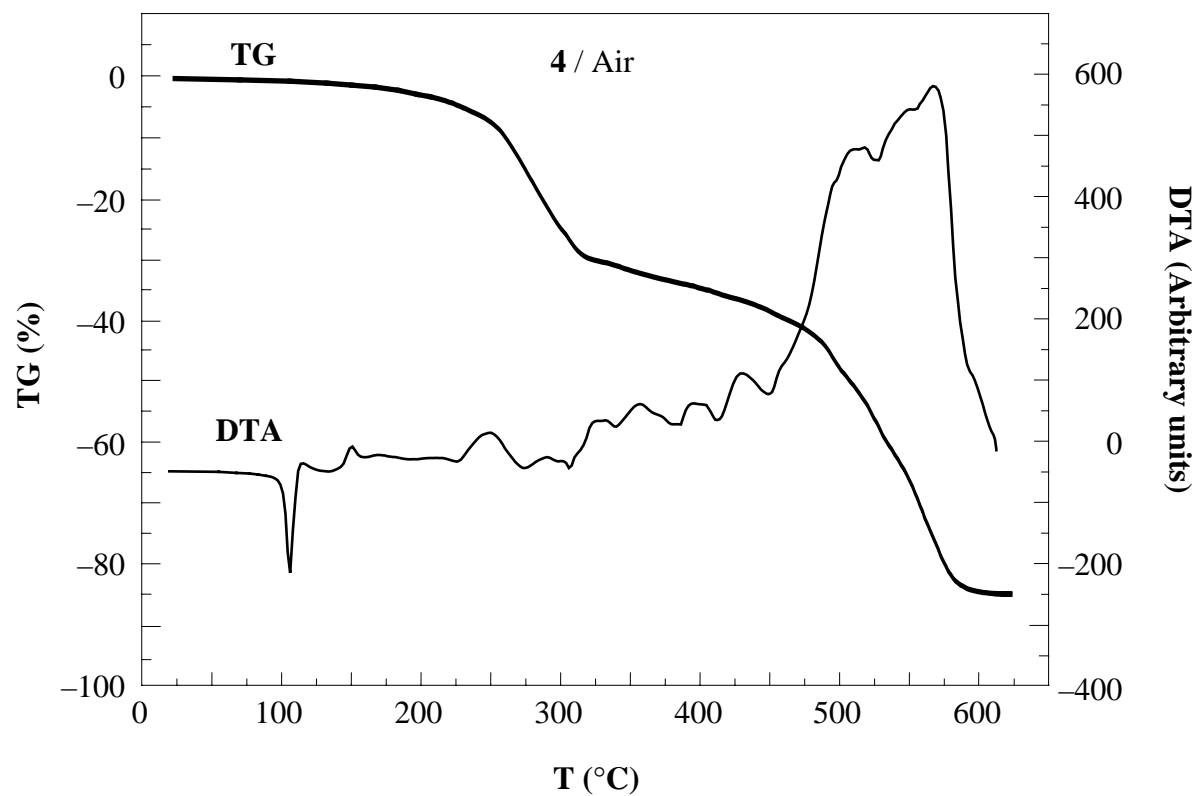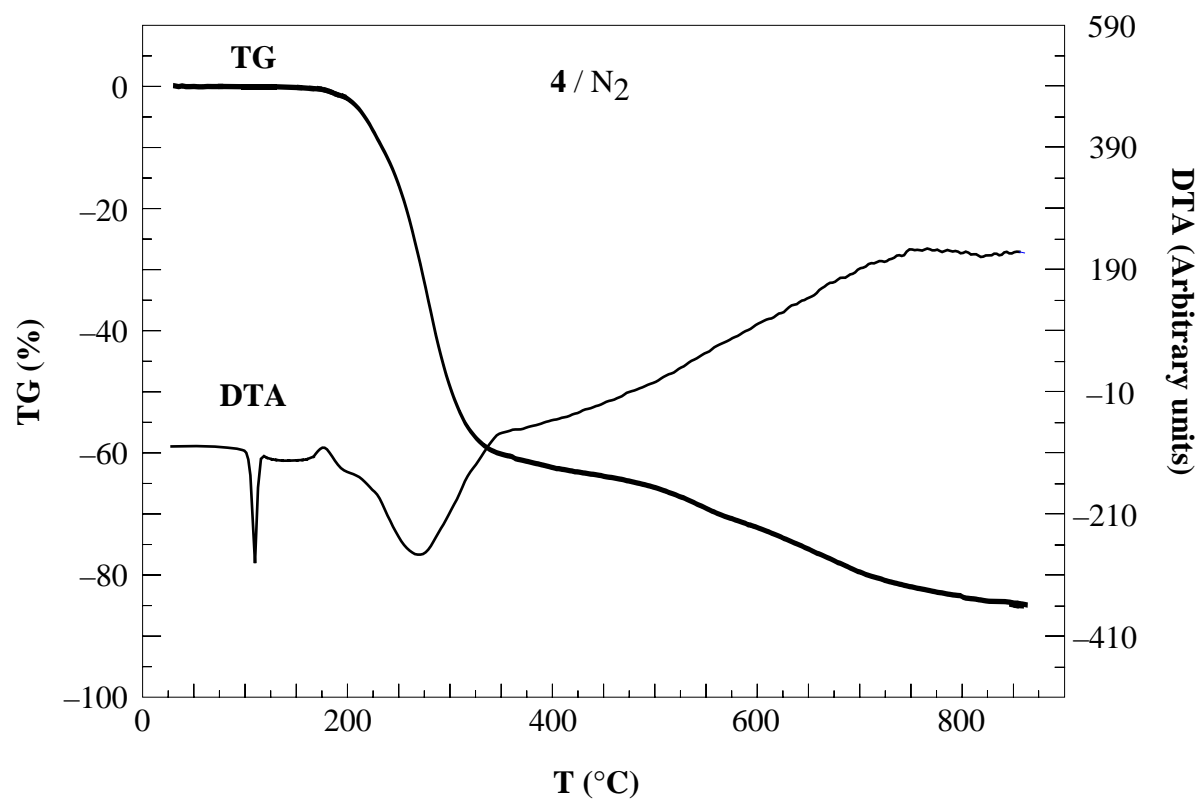

Supplement: b104085p.pdf [file b104085p.pdf]
